# Supplementary material
Source: Research Square preprint supplement (doi:10.21203/rs.3.rs-9749962/v1)
Supplement: Supplementary file 1 [file d06be1cb2848e4968ac0d718.pdf]

1 **Supplementary Data for: Effects of rare taxa on fish index of biotic integrity**  
2 **results in a southeastern US biodiversity hotspot**

3 Justin C. Bagley <sup>1,2,3,\*</sup> · Patrick E. O’Neil <sup>4</sup> · Elizabeth S. Huff <sup>1</sup>

4 <sup>1</sup> *Environmental Indicators Section, Field Operations Division, Alabama Department of*  
5 *Environmental Management, P.O. Box 301463, Montgomery, AL 36130, USA*  
6 *[justin.bagley@adem.alabama.gov](mailto:justin.bagley@adem.alabama.gov); <https://orcid.org/0000-0001-6737-8380>*

7  
8 <sup>2</sup> *Department of Biology and Environmental Sciences, Auburn University at Montgomery,*  
9 *7061 Senators Dr., Rm. 209 O GH, Montgomery, AL 36117, USA*

10  
11 <sup>3</sup> *Department of Biology, Virginia Commonwealth University, 1000 W Cary St., Suite*  
12 *126, Richmond, VA 23284, USA*

13  
14 <sup>4</sup> *Geological Survey of Alabama, Walter B. Jones Hall, 420 Hackberry Lane, Tuscaloosa,*  
15 *AL 35487, USA (retired)*

16 *\* Corresponding author.*

17  
18 **Data S1. Supplementary Methods, Results, & Discussion**

19 *Note:* references not cited in the main text are presented in the References section of this  
20 document; see main text for all other cited works. Abbreviations follow the main text.

21 **Supplementary Methods**

22 As noted in the main text, Alabama currently has five fish biogeographic provinces, or  
23 ‘ichthyoregions’. The initial state ichthyoregion classification was developed by O’Neil and  
24 Shepard (2007) based on cluster analysis of Alabama fish community survey data, and the  
25 classification was later updated in subsequent studies (e.g., O’Neil and Shepard 2010, 2011a,b).  
26 The different ichthyoregions of the state generally contain internally cohesive species  
27 assemblages, physiographic attributes, and geologic settings, as well as similar stream types  
28 (O’Neil and Shepard 2007), and one fish IBI tool has been calibrated for each ichthyoregion  
29 (Table 1). A map of Alabama’s ichthyoregions is provided for reference in Fig. S1 *below*.

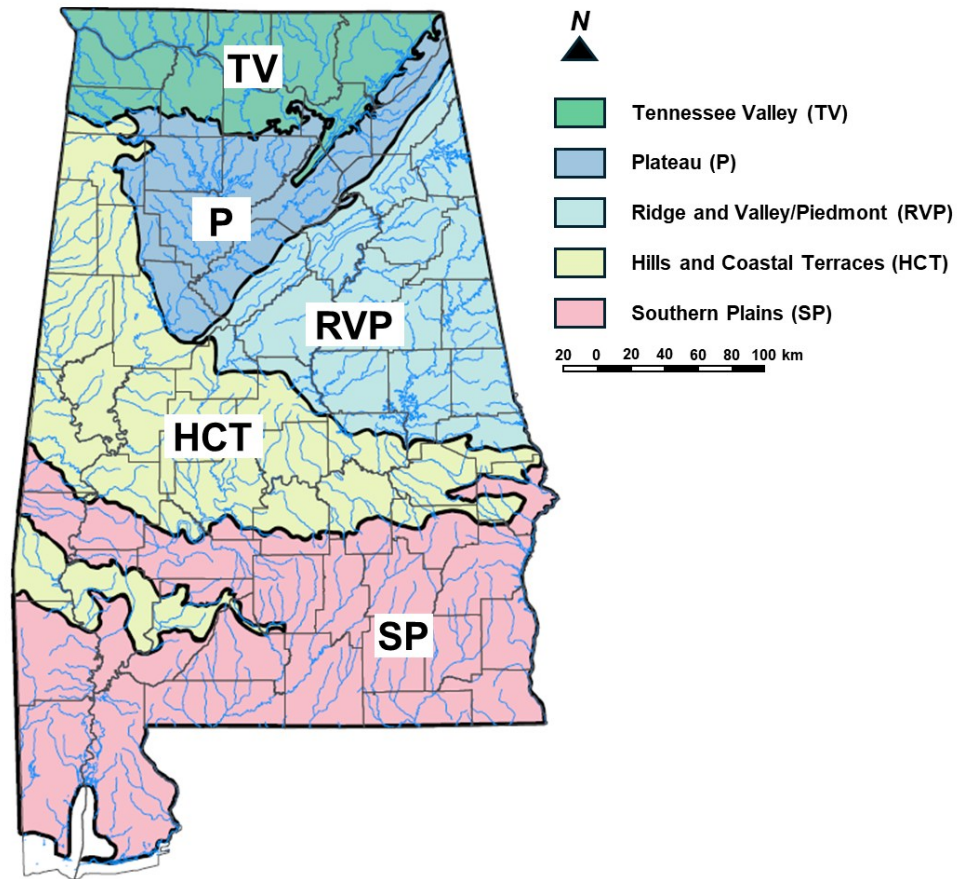

30

31 **Fig. S1** Map of the five ichthyoregions of Alabama. Ichthyoregions refer to distinct, yet  
 32 internally cohesive, fish faunal assemblages. The map *above* was modified and partly redrawn  
 33 after O’Neil and Shepard (2011b), while maintaining their color scheme (see legend).

34 Wilcoxon signed-rank tests were conducted to evaluate the overall significance of  
 35 differences in metric-level regression parameters, including goodness-of-fit statistics (i.e.,  $R^2$ )  
 36 and slopes, between the SDR and ART treatments, as the data were non-normal (typically left-  
 37 skewed) and paired (same metric for each treatment). A valid test was possible when comparing  
 38 post-SDR and post-ART  $R^2$  distributions from the regression models; however, comparisons  
 39 including SRT  $R^2$ -values would not be valid. The reason for this was that the SRT treatment  
 40 matrix that was used to calculate IBI outcomes was a long-format resampling of the original data  
 41 matrix with  $n = 3,007$  sites/rows, making the observations violate the common statistical  
 42 assumption that data are independent and identically distributed. Tests were conducted in the R

43 statistical environment (R Core Team 2023) using the `wilcox.test()` function, and results  
44 were considered significant at the  $\alpha = 0.05$  level.

## 45 **Supplementary Results**

### 46 ***Data and treatment characteristics***

47 The sampled fish taxa included 78 North American minnow species (Leuciscidae) including 50  
48 ‘shiners’ from genera *Alburnops*, *Coccotis*, *Cyprinella*, *Ericymba*, *Luxilus*, *Lythrurus*, *Miniellus*,  
49 *Notropis*, *Paranotropis*, and *Pteronotropis*; 18 sucker species (Catostomidae); ~18–22 sunfish  
50 and black basses (Centrarchidae); 68 darter species (Percidae: Etheostomatinae); and 8 madtom  
51 species (Ictaluridae: *Noturus*; Bagley et al. 2023). The 11 species that were globally rare in the  
52 fish community data matrix analyzed in this study included one lamprey (*Lethenteron appendix*;  
53 Petromyzontidae), one herring (*Alosa chrysochloris*; Dorosomatidae), two minnows (*Cyprinella*  
54 *callitaenia*, *Hybognathus hayi*; Leuciscidae), one sucker (*Carpionodes carpio*; Catostomidae), one  
55 madtom (*Noturus* sp. cf. *flavus*; Ictaluridae), four darters—*Etheostoma boschungii*, *Etheostoma*  
56 *trisella*, *Nothonotus (Etheostoma) wapiti*, and *Percina phoxocephala* (Percidae), and the  
57 introduced Asian pond loach (*Misgurnus anguillicaudatus*; Cobitidae; Bagley et al. 2023). The  
58 leuciscid minnows of Alabama were all formerly lumped within Cyprinidae, and these taxa are  
59 still referred to informally as ‘cyprinids’ by some biologists as well as in our Alabama fish IBI  
60 metric names (e.g., Tables 1 and S1; O’Neil et al. 2006; O’Neil and Shepard 2010), which were  
61 published before the taxonomic changes placing North American minnows in Leuciscidae took  
62 effect (Tan and Armbruster 2018; Stout et al. 2022; Bagley et al. 2023).

### 63 ***Effects of rare taxon removal on IBI scores and condition ratings***

64 Regarding treatment effects on site IBI scores, a feature presented in the text but not expanded  
65 upon precisely was that the IQR of scores increased with treatment intensity, from SRT to ART

66 and SDR (Table 2). Likewise, the ranges of changes in IBI scores varied with treatment intensity.  
67 While these changes are visualized in Figs 2A-C of the main text and supplementary Fig. S2  
68 *below*, the raw ranges were from  $-8$  to  $+6$  points around the original IBI scores following the  
69 SRT treatment, from  $-14$  to  $+6$  points around the original scores for SDR, and from  $-12$  to  $+10$   
70 points around the original scores for ART. The near-unity regression of post-treatment on

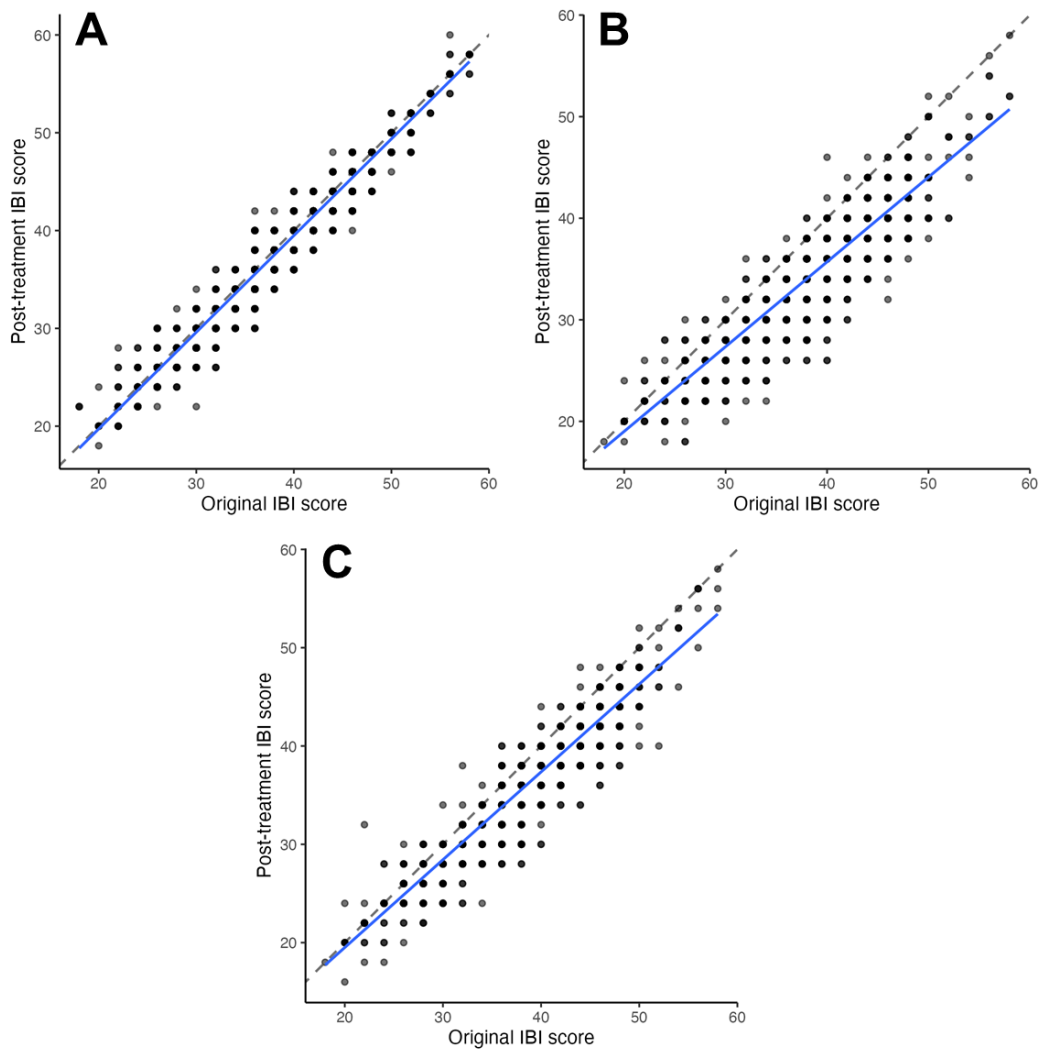

71  
72 **Fig. S2** Scatterplots of post-treatment ( $y$ -axis) vs. original site IBI scores ( $x$ -axis). Results are  
73 shown for each of the three treatments discussed in the main text, including the (A) SRT, (B)  
74 SDR, and (C) ART removal treatments. Site results (*transparent gray dots*) are shown alongside  
75 the corresponding fitted regression lines (*blue lines*) and a unit (1:1) line for reference (*dashed*  
76 *line*).

77

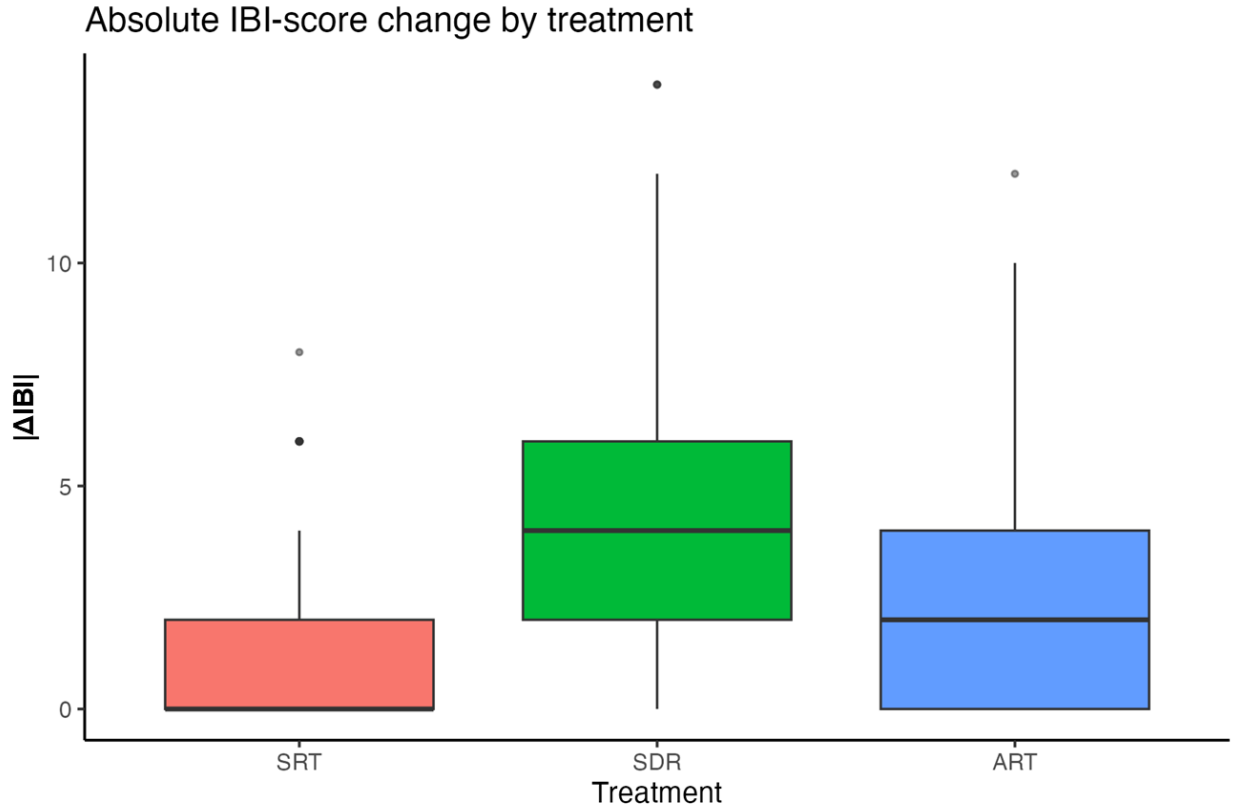

78

79 **Fig. S3** Box plot summaries of the absolute value of change in IBI score ( $|\Delta\text{IBI}|$ ) across sites,  
 80 presented for each treatment. Here, the raw response variable was calculated as  $\Delta\text{IBI} = \text{IBI}_{R,i}$   
 81  $- \text{IBI}_{O,i}$ , as discussed in the main text. *Vertical lines and dots* represent the range of values, *top*  
 82 *and bottom of boxes* indicate the third and first quartiles (75% and 25%), respectively, and the  
 83 *dark lines* represent median values.

84

85 original IBI scores ( $R^2 = 0.969$ ,  $a = 0.988$ ,  $b = -0.04$ ) and a low nRMSE of 2.86% under the SRT  
 86 treatment confirmed that removing a single rare taxon rarely disrupts the Alabama fish IBIs,  
 87 overall (e.g., Fig. S2A). In contrast, the IBI score regression following the SDR treatment  
 88 showed clear compression bias ( $R^2 = 0.809$ ,  $a = 0.834$ ,  $b = 2.33$ ; Fig. S2B), and nRMSE for  
 89 metric scores after this treatment reached 10.73%. And, last, under the ART treatment, the IBI  
 90 score regression indicated a modest but consistent downward bias ( $R^2 = 0.874$ ,  $a = 0.893$ ,  $b =$   
 91  $1.65$ ; Fig. S2C), and nRMSE was 7.51%.

92 Our analyses of the absolute value of changes in IBI scores for sites ( $|\Delta\text{IBI}|$ ) provided

93 additional evidence on the effects of rare taxon removal on fish IBI scores and condition ratings.  
 94 For example, box plots of  $|\Delta\text{IBI}|$  as a function of treatment showed that, as with raw IBI changes  
 95 and  $R^2$  above, the resulting median  $|\Delta\text{IBI}|$  values tracked treatment intensity, increasing from  
 96 SRT to ART to SDR, and also showed the greatest variance under the SDR treatment (Fig. S3).  
 97 Furthermore, box plots evaluating  $|\Delta\text{IBI}|$  as a function of our five species richness classes ( $S$ ), six  
 98 abundance classes ( $N$ ), and five drainage area classes revealed that changes in IBI scores were  
 99 relatively invariant under the SRT treatment (Figs. S4A,B and S5A), had higher medians and  
 100 variance under the ART treatment (Figs. S4E,F and S5C), and showed roughly the highest  
 101 medians and variance under the SDR treatment (Figs. S4C,D and S5B). Within treatments,  $|\Delta\text{IBI}|$

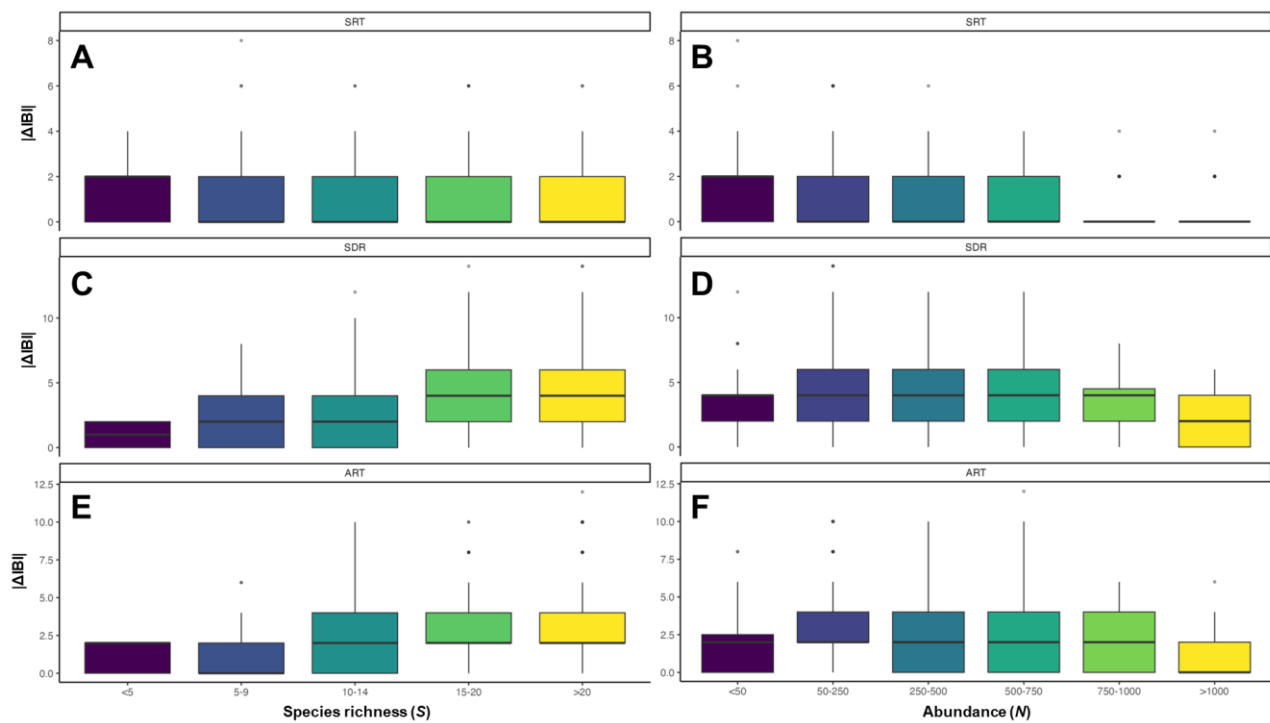

102

103 **Fig. S4** Summaries of the absolute value of change in IBI score ( $|\Delta\text{IBI}|$ ) across sites as a function  
 104 of sampling intensity classes discussed in the main text (which are the same classes as those  
 105 shown in Fig. 4). Results are presented as box plots stratified by sample species richness ( $S$ ) and  
 106 abundance ( $N$ ) for each of the three treatments, including (A, B) SRT removal, (C, D) SDR  
 107 removal, and (E, F) ART removal. Stratification was based on five species richness classes ( $S =$   
 108  $\leq 5, 5-9, 10-14, 15-20,$  and  $> 20$ ) and six abundance classes ( $N = < 50, 50-250, 250-500, 500-$   
 109  $750, 750-1000,$  and  $> 1000$ ). Box representations are the same as those described in the caption  
 110 to Fig. S3 above, except each box is assigned a *different color* by class.

111 results were particularly robust to variation in drainage area, with little to no change in medians  
 112 across drainage size classes (Fig. S5). Yet, comparing the  $S$  and  $N$  analyses, median  $|\Delta\text{IBI}|$   
 113 increased the most for the  $S = 15\text{--}20$  and  $S > 20$  species-richness classes under the SDR  
 114 treatment (Fig. S4C,D). Compared with the smallest abundance class, median  $|\Delta\text{IBI}|$  rose  
 115 similarly for the four  $N$  classes ranging from 50 to 1000 individuals (i.e.,  $N = 50\text{--}250$ ,  $250\text{--}500$ ,  
 116  $500\text{--}750$ , and  $750\text{--}1000$  individuals) under the SDR and ART treatments (Fig. S4D,F). and  
 117 dropped back to lower levels in the largest abundance class ( $N > 1000$ ).

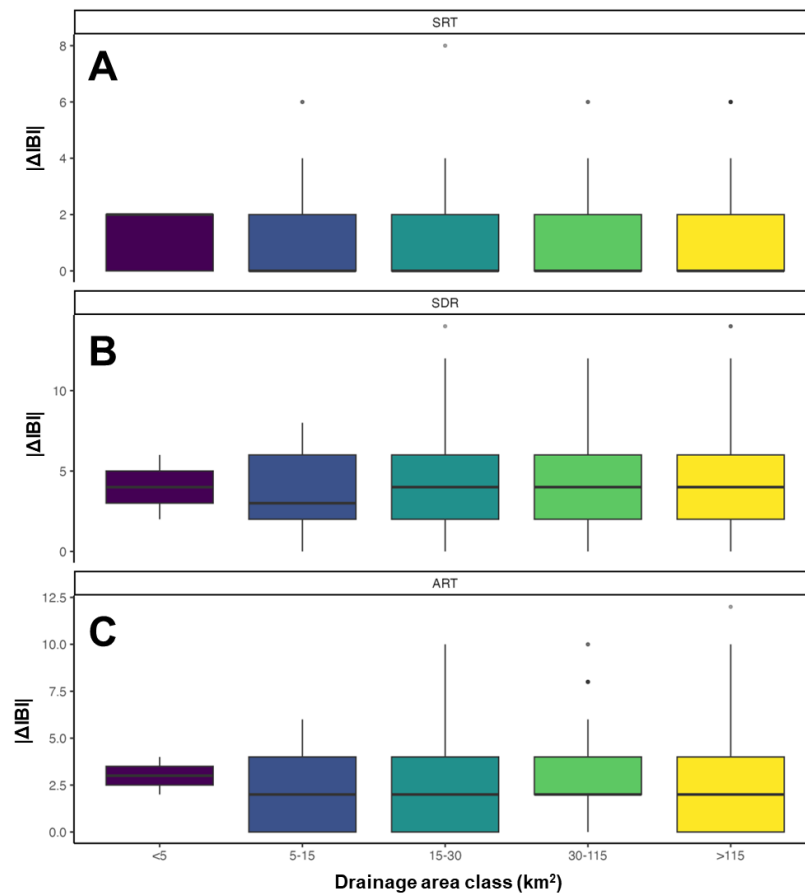

118  
 119 **Fig. S5** Summaries of the absolute value of change in IBI score ( $|\Delta\text{IBI}|$ ) across sites, presented as  
 120 a function of drainage area classes discussed in the text (which are the same classes as those  
 121 shown in plots of nRMSE in Fig. S9 below). Results are presented as box plots stratified by site  
 122 drainage areas for each of the three treatments, including (A) SRT removal, (B) SDR removal,  
 123 and (C) ART removal. Box representations are the same as those described in the caption to Fig.  
 124 S3 above, except each box is assigned a *different color* based on  $x$ -axis class.

125 ***Per-metric responses and treatment intensity***

126 The full results of linear regression analyses of post-treatment IBI metric scores as a function of  
127 original scores are presented in Figs S6–S8 and Table S1 *below*. Linear modeling of metric  
128 scores provided additional evidence that the SDR treatment had the greatest effect on IBI metric  
129 scores, and the regression results agreed well with the per-metric  $\kappa$  results (Table S2 *below*).

130 Iteratively removing each rare taxon within each sample in the SRT treatment to create  
131 replicate samples ( $n = 3,007$ ) caused marginal decreases in IBI metric scores, with regression  
132 slope parameters and  $R^2$  goodness-of-fit statistics generally falling near 1.0 (mean  $\pm$  s.d.  $a = 0.95$   
133  $\pm 0.07$ , mean  $\pm$  s.d.  $R^2 = 0.92 \pm 0.08$ ; Fig. S6; Table S1). In line with our a priori expectations,  
134 post-SRT removal IBI metric scores more frequently deviated from the original scores for  
135 metrics representing measures of species richness (mean  $\pm$  s.d.  $R^2 = 0.89 \pm 0.06$ ; see metric types  
136 in Table 1) when compared with metrics based on species relative abundances (mean  $\pm$  s.d.  $R^2 =$   
137  $0.95 \pm 0.09$ ). However, given  $R^2$ -values for abundance metric models after SRT were left-  
138 skewed, a Welch's  $t$ -test was applied (because it allows comparison of means without assuming  
139 equal variances) and showed the  $R^2$  distribution for richness metrics was not significantly  
140 different than that for abundance-based metrics under this treatment ( $t = -1.70$ ,  $df = 15.54$ ,  $p =$   
141  $0.11$ ). Post-treatment metrics with the greatest deviations from the original scores based on  $R^2$   
142 values were '% DELT + hybrids' followed by several richness measures, including 'Number of  
143 centrarchid species', 'Total native species', 'Number of *Lepomis* species', and 'Number of  
144 sucker species' (Fig. S6; Table S1). Intercepts,  $b$ , for all SRT regressions were close to zero but  
145 positive, indicating post-treatment IBI metric scores increased slightly after removals.

146 After removing singleton/doubleton taxa in the SDR treatment, IBI metric scores  
147 decreased to a greater extent than for SRT, causing the regression slope and  $R^2$  statistics to reach

148 **Table S1** Linear regression results showing the fit between post-treatment and original IBI metric scores, following three removal  
 149 treatments. Regressions were performed separately on results from 1) removing single rare taxa within each sample, 2) removing  
 150 singleton/doubleton taxa, and 3) removing all rare taxa. The “Metric label” column gives abbreviated names matching Figs S6–S8  
 151 *below* (for full names, see Table 1, main text).

| Metric label             | Single-rare-taxon removal |                       |          |          | Singleton/doubleton removal |                       |          |          | All-rare-taxa removal |                       |          |          |
|--------------------------|---------------------------|-----------------------|----------|----------|-----------------------------|-----------------------|----------|----------|-----------------------|-----------------------|----------|----------|
|                          | <i>N</i>                  | <i>R</i> <sup>2</sup> | <i>a</i> | <i>b</i> | <i>N</i>                    | <i>R</i> <sup>2</sup> | <i>a</i> | <i>b</i> | <i>N</i>              | <i>R</i> <sup>2</sup> | <i>a</i> | <i>b</i> |
| Total native spp.        | 3007                      | 0.82                  | 0.93     | 0.082    | 719                         | 0.34                  | 0.55     | 0.28     | 719                   | 0.44                  | 0.66     | 0.35     |
| No. shiner spp.          | 1885                      | 0.95                  | 0.97     | 0.045    | 444                         | 0.64                  | 0.76     | 0.26     | 444                   | 0.79                  | 0.87     | 0.17     |
| No. cyprinid spp.        | 1122                      | 0.91                  | 0.95     | 0.050    | 274                         | 0.58                  | 0.65     | 0.33     | 273                   | 0.70                  | 0.78     | 0.19     |
| No. sucker spp.          | 2252                      | 0.90                  | 0.92     | 0.067    | 546                         | 0.42                  | 0.47     | 0.51     | 545                   | 0.58                  | 0.63     | 0.34     |
| No. darter+madtom spp.   | 3007                      | 0.90                  | 0.96     | 0.037    | 719                         | 0.53                  | 0.64     | 0.26     | 719                   | 0.65                  | 0.77     | 0.19     |
| No. Lepomis spp.         | 1877                      | 0.87                  | 0.94     | 0.16     | 447                         | 0.32                  | 0.61     | 0.89     | 447                   | 0.53                  | 0.75     | 0.62     |
| No. centrarchid spp.     | 618                       | 0.78                  | 0.87     | 0.20     | 146                         | 0.33                  | 0.48     | 0.33     | 146                   | 0.40                  | 0.59     | 0.33     |
| No. intolerant spp.      | 1267                      | 0.95                  | 0.96     | 0.054    | 298                         | 0.69                  | 0.75     | 0.31     | 298                   | 0.79                  | 0.83     | 0.24     |
| % tolerant spp.          | 2997                      | 0.98                  | 0.99     | 0.012    | 716                         | 0.94                  | 0.98     | 0.11     | 717                   | 0.97                  | 0.99     | 0.04     |
| % dominant spp.          | 1122                      | 0.99                  | 1.00     | -0.001   | 274                         | 0.90                  | 0.96     | 0.14     | 273                   | 0.95                  | 0.98     | 0.07     |
| % Lepomis                | 2389                      | 0.98                  | 0.99     | 0.033    | 573                         | 0.96                  | 0.99     | 0.05     | 573                   | 0.98                  | 1.00     | 0.03     |
| % GSF+YB                 | 618                       | 0.92                  | 0.95     | 0.25     | 145                         | 0.55                  | 0.70     | 1.61     | 146                   | 0.72                  | 0.84     | 0.93     |
| % invertivores           | 1130                      | 0.99                  | 0.99     | 0.004    | 270                         | 0.95                  | 0.99     | 0.07     | 271                   | 0.98                  | 0.99     | 0.02     |
| % omnivores              | 1695                      | 0.99                  | 1.00     | -0.010   | 433                         | 0.98                  | 1.00     | -0.04    | 433                   | 1.00                  | 1.00     | -0.01    |
| % insect. cyprinids      | 2067                      | 0.98                  | 1.00     | 0.016    | 457                         | 0.91                  | 0.99     | 0.12     | 458                   | 0.96                  | 1.00     | 0.05     |
| % top carnivores         | 3007                      | 0.93                  | 0.98     | -0.006   | 718                         | 0.61                  | 0.82     | -0.01    | 719                   | 0.77                  | 0.92     | -0.03    |
| % DELT+hybrids           | 3007                      | 0.71                  | 0.72     | 1.39     | 718                         | 0.19                  | 0.20     | 4.01     | 719                   | 0.39                  | 0.42     | 2.92     |
| No. lithophilic spawners | 1885                      | 0.93                  | 0.96     | 0.037    | 444                         | 0.61                  | 0.73     | 0.24     | 444                   | 0.73                  | 0.83     | 0.14     |
| % simple lithophils      | 1122                      | 0.99                  | 0.99     | 0.008    | 274                         | 0.97                  | 0.99     | 0.04     | 273                   | 0.99                  | 1.00     | 0.01     |

152 Regression abbreviations: *a*, slope; *b*, intercept; *N*, number of samples where metric was applied; *R*<sup>2</sup>, coefficient of determination

153 (goodness-of-fit statistic). Other abbreviation definitions follow the text and Table 1.

154

155 their lowest values among any removal treatment results (mean  $\pm$  s.d.  $a = 0.75 \pm 0.23$ , mean  $\pm$   
156 s.d.  $R^2 = 0.65 \pm 0.26$ ; Fig. S7; Table S1). Post-treatment IBI metric scores deviated more  
157 frequently from the original scores for richness-based metrics (mean  $\pm$  s.d.  $R^2 = 0.50 \pm 0.15$ ) as  
158 compared to relative abundance metrics (mean  $\pm$  s.d.  $R^2 = 0.80 \pm 0.26$ ) for this second treatment.  
159 Again Welch's  $t$ -test was appropriate, but in this case differences in  $R^2$  values between these two  
160 metric types were statistically significant ( $t = -3.13$ ,  $df = 14.28$ ,  $p < 0.01$ ). The post-treatment  
161 IBI metrics with the greatest deviations from original metric scores after the SDR treatment were  
162 the same five listed above for the SRT treatment. Intercept parameters for regressions  
163 corresponding to this second treatment were  $\sim 1.4$ -fold to  $\sim 99$ -fold higher than those for the SRT  
164 removal treatment, consistent with a greater depression of IBI metric scores for larger original  
165 IBI metric scores and/or an increase in post-treatment IBI metric scores for lower original IBI  
166 metric scores. Two exceptional cases, with negative regression intercepts, were the '%  
167 omnivores' metric ( $b = -0.04$ ) and the '% top carnivores' metric ( $b = -0.01$ ; Fig. S7; Table S1).  
168 The highest intercept value was  $b = 4.01$  for the '% DELT+ hybrids' metric, indicating a greater  
169 decline in post-treatment IBI metric scores for this metric, as compared with other metrics.

170 After removing all rare taxa in the ART treatment, IBI metric scores decreased such that  
171 regression slope and  $R^2$  statistics fell noticeably below 1.0 (mean  $\pm$  s.d.  $a = 0.83 \pm 0.17$ , mean  $\pm$   
172 s.d.  $R^2 = 0.75 \pm 0.21$ ; Fig. S8; Table S1). Again, consistent with our expectations based on prior  
173 work (Wan et al. 2010), the post-treatment IBI metric scores more frequently deviated from the  
174 original scores for species richness metrics (mean  $\pm$  s.d.  $R^2 = 0.62 \pm 0.15$ ) as compared with  
175 those based on relative abundances (mean  $\pm$  s.d.  $R^2 = 0.87 \pm 0.20$ ). A Welch's  $t$ -test showed that  
176 differences in  $R^2$  values between these two metric types under ART were highly statistically  
177 significant ( $t = -3.16$ ,  $df = 16.45$ ,  $p < 0.01$ ). The five post-treatment IBI metrics with the greatest

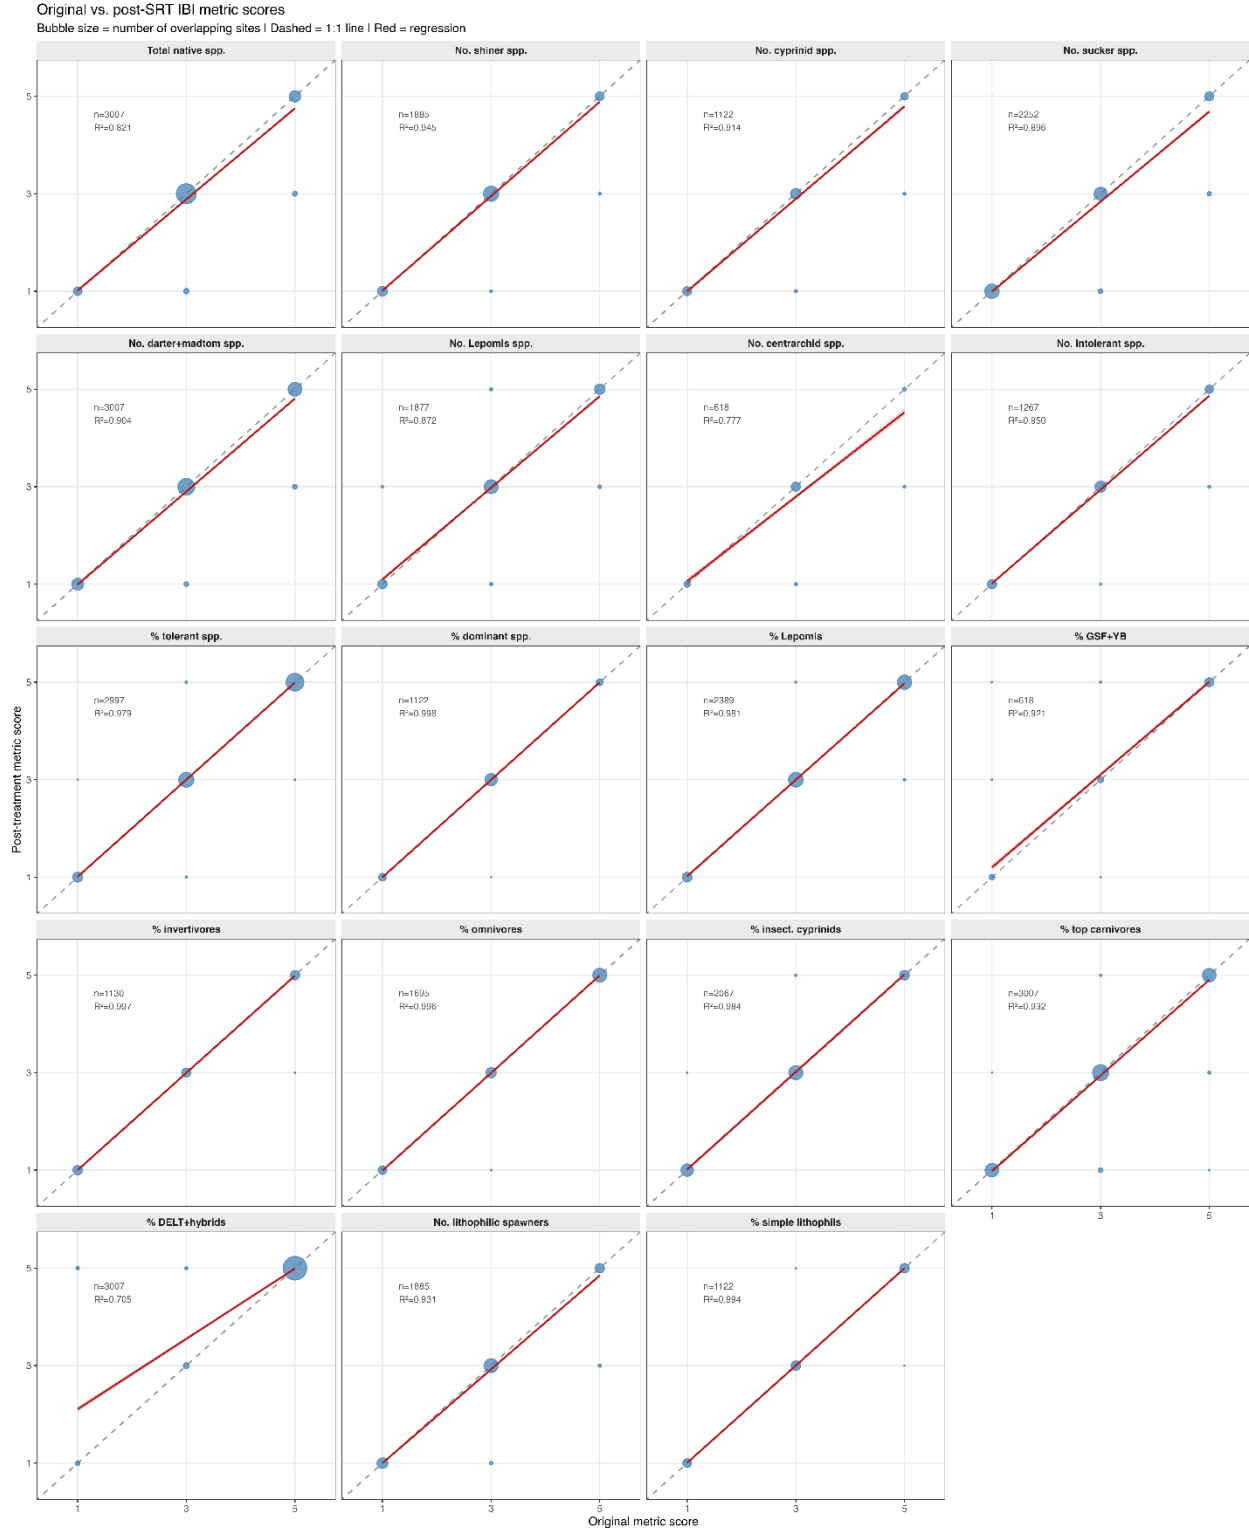

178

179 **Fig. S6** Plots of post-treatment (y-axis) versus original (x-axis) IBI metric scores following the  
 180 single-rare-taxon (SRT) removal treatment. Results are presented as one panel for each of the 19  
 181 metrics in this study. Raw values are shown as *transparent blue bubbles*, with bubble size  
 182 proportional to the number of overlapping observations (sites), while *red lines* display the fitted

183 regression lines, and a *gray dashed 1:1 line* is shown for reference. Sample sizes and coefficients  
 184 of determination ( $R^2$ ) are inset in the upper left of each panel, and panel headings give the  
 185 corresponding metric names.

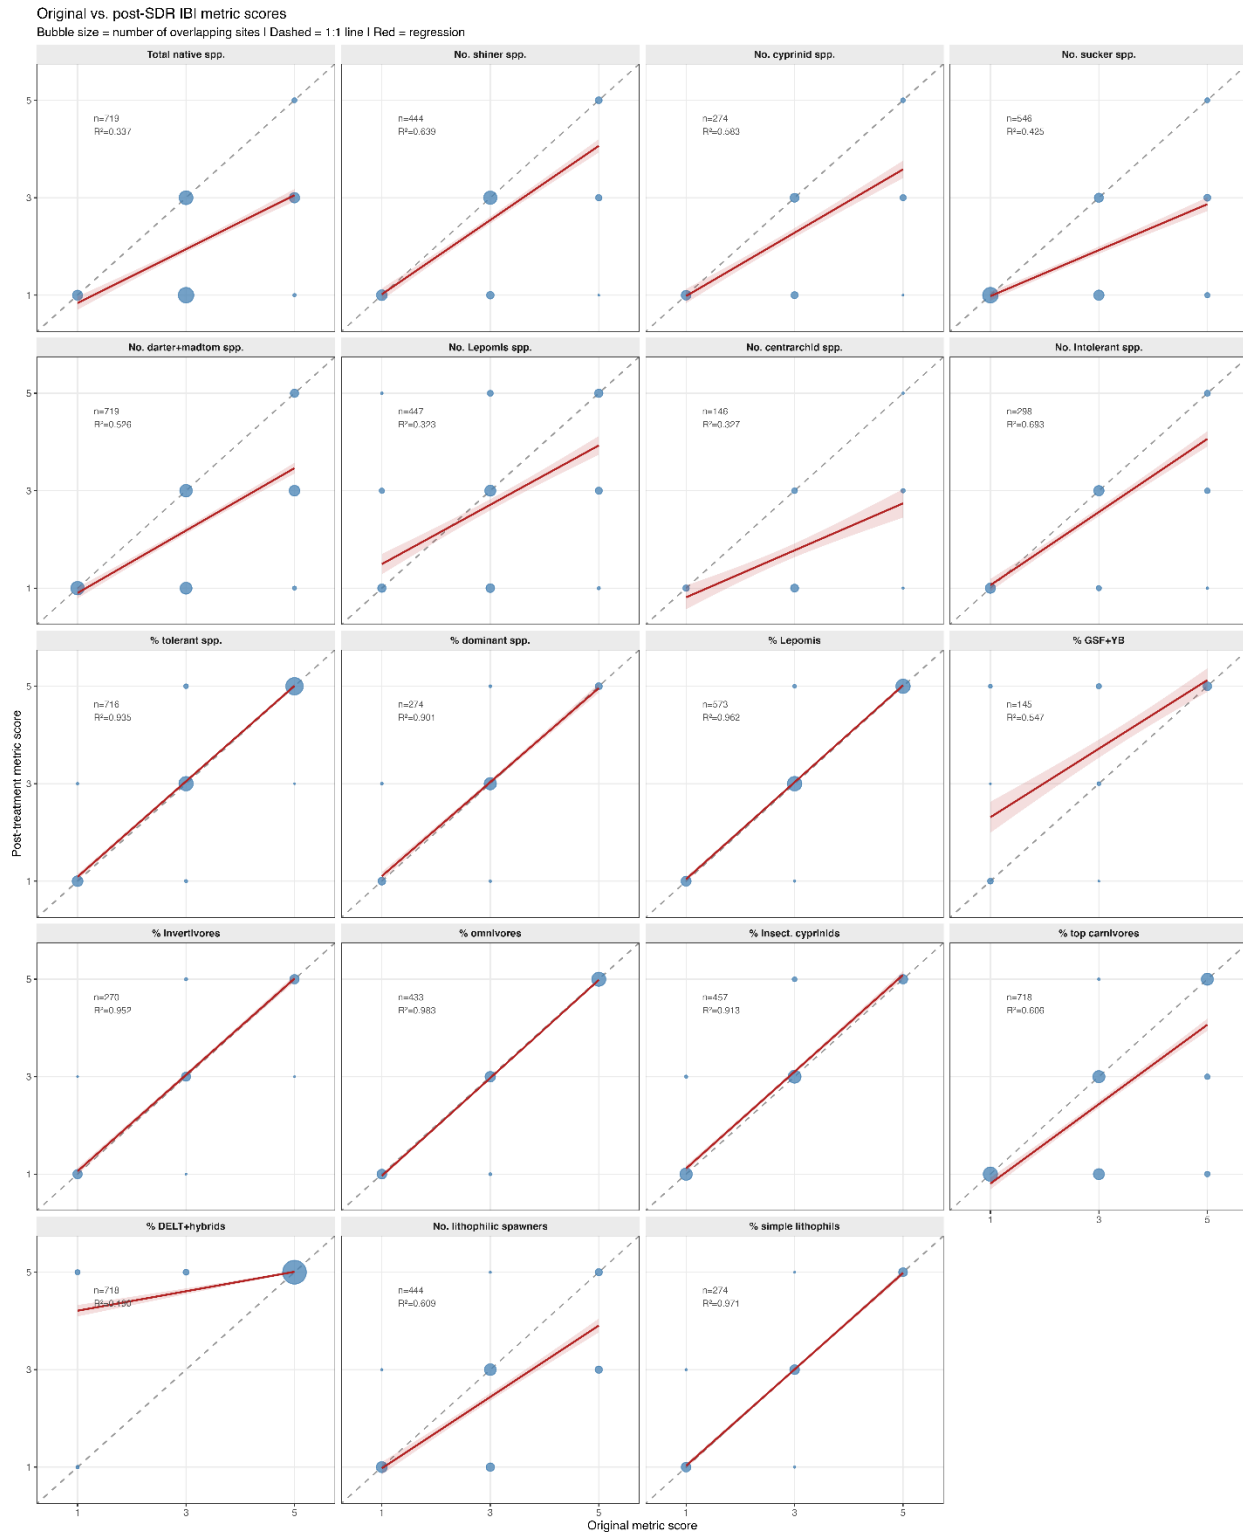

186  
 187 **Fig. S7** Plots of post-treatment versus original IBI metric scores following singleton/doubleton

188 removal (SDR). Panel formatting follows that in Fig. S6 *above* (see caption of that figure for  
 189 additional details).

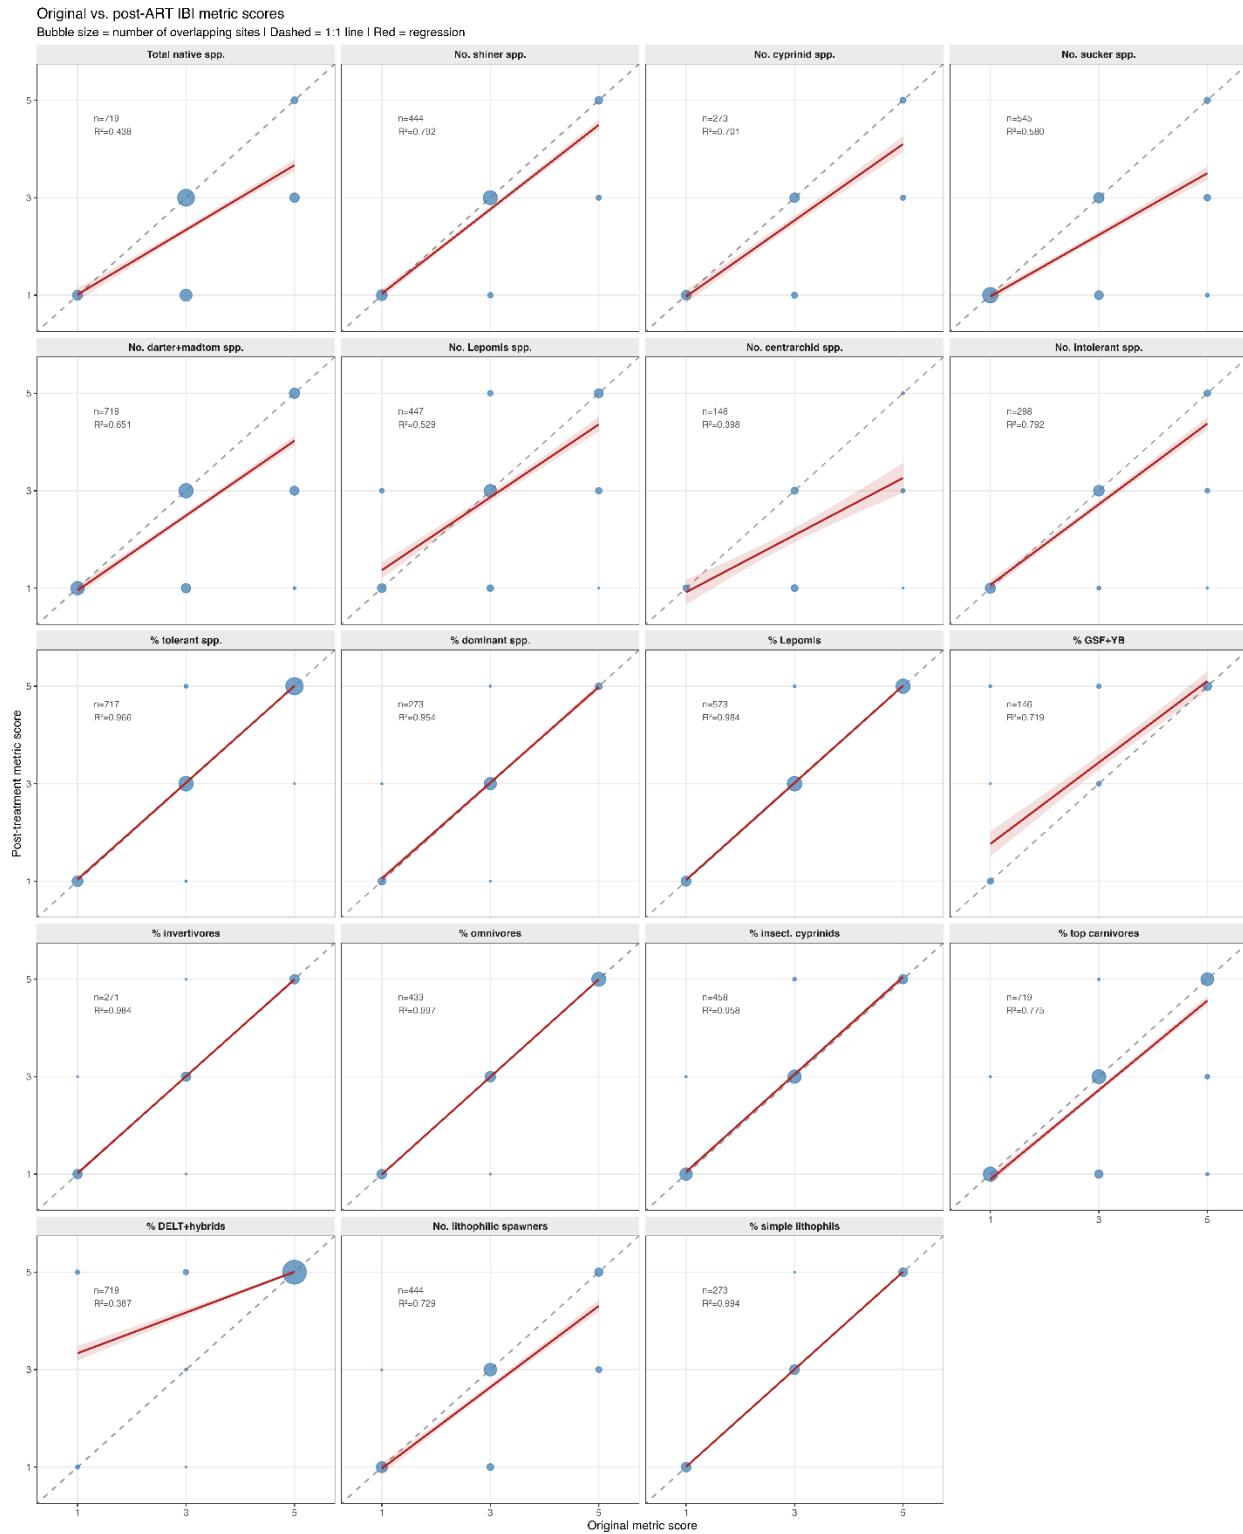

190

191 **Fig. S8** Plots of post-treatment versus original IBI metric scores following the all-rare-taxa

192 (ART) removal treatment. Panel formatting follows that in Fig. S6 *above* (see caption of that  
193 figure for additional details).  
194

195 deviations from original metric scores were again ‘% DELT + hybrids’, ‘Number of centrarchid  
196 species’, ‘Total native species’, ‘Number of *Lepomis* species’, and ‘Number of sucker species’  
197 (Table S1). Intercept parameters,  $b$ , for regressions corresponding to this third removal treatment  
198 were up to ~51-fold higher than those for the first removal experiment (median 3.7-fold higher),  
199 consistent with a substantial effect on IBI metric scores in essentially all cases. The only  
200 exception to this was the ‘% top carnivores metric’, which had a negative intercept ( $b = -0.03$ )  
201 after removal (Table 2). The highest intercept value,  $b = 2.92$ , was obtained for the regression  
202 corresponding to the ‘% DELT + hybrids’ metric.

### 203 ***IBI metric agreement and rare taxon removal***

204 As noted in the main text, Cohen’s  $\kappa$  calculations were made overall and for each IBI metric to  
205 quantify the agreement between post-treatment versus original IBI metric scores. While Fig. 2D–  
206 F of the main text provide visualizations of the distributions of per-metric  $\kappa$ -values, colored by  
207 metric type, the full results for each per-metric  $\kappa$  test are presented *below* in Table S2. Only four  
208 metrics had  $\kappa = 1.00$  indicating perfect agreement with their original values after the SRT  
209 treatment, including ‘% dominant species’, ‘% invertivores’, ‘% omnivores’, and ‘% simple  
210 lithophils’. Two of these metrics, ‘% omnivores’ and ‘% simple lithophils’, also showed perfect  
211 agreement with their original values following the ART removal treatment. ‘Total native species’  
212 showed the most reduced agreement with original metric scores across our three treatments  
213 (Table S2). Central tendencies of  $\kappa$  under each treatment are given in the main text. The overall  
214 pattern of  $\kappa$ -value findings supported the SDR treatment as having the greatest effect on the IBI  
215 metrics, and SDR and ART having greater effects on IBI metrics than the SRT treatment.

216 **Table S2** Summary of per-metric weighted Cohen’s  $\kappa$ -values for IBI metric scores. Results are presented for all 19 metrics used in  
 217 Alabama fish IBIs, with the “Metric label” column giving abbreviated names matching Fig. 2 (for full names, see Table 1, main text).  
 218 The three treatments were: 1) removal of single rare taxa, 2) singleton/doubleton removal, and 3) removal of all rare taxa.  $P$ -values are  
 219 not presented, as all tests were highly significant ( $p < 0.0001$ ), thus  $\kappa$ -values took precedent for interpretation.

| Metric label             | Single-rare-taxon removal |                  |       | Singleton/doubleton removal |                  |       | All-rare-taxa removal |                  |       |
|--------------------------|---------------------------|------------------|-------|-----------------------------|------------------|-------|-----------------------|------------------|-------|
|                          | $N$                       | Cohen’s $\kappa$ | $z$   | $N$                         | Cohen’s $\kappa$ | $z$   | $N$                   | Cohen’s $\kappa$ | $z$   |
| Total native spp.        | 3007                      | 0.88             | 66.20 | 719                         | 0.25             | 12.74 | 719                   | 0.45             | 19.45 |
| No. shiner spp.          | 1885                      | 0.96             | 57.07 | 444                         | 0.70             | 20.24 | 444                   | 0.85             | 23.99 |
| No. cyprinid spp.        | 1122                      | 0.94             | 41.70 | 274                         | 0.59             | 13.54 | 273                   | 0.74             | 16.24 |
| No. sucker spp.          | 2252                      | 0.92             | 55.89 | 546                         | 0.47             | 15.77 | 545                   | 0.63             | 19.56 |
| No. darter+madtom spp.   | 3007                      | 0.93             | 67.81 | 719                         | 0.50             | 20.19 | 719                   | 0.68             | 25.41 |
| No. Lepomis spp.         | 1877                      | 0.91             | 53.06 | 447                         | 0.44             | 12.93 | 447                   | 0.64             | 18.21 |
| No. centrarchid spp.     | 618                       | 0.85             | 27.94 | 146                         | 0.26             | 5.56  | 146                   | 0.41             | 7.49  |
| No. intolerant spp.      | 1267                      | 0.96             | 45.57 | 298                         | 0.76             | 17.50 | 298                   | 0.85             | 19.37 |
| % tolerant spp.          | 2997                      | 0.99             | 67.84 | 716                         | 0.95             | 32.11 | 717                   | 0.98             | 32.94 |
| % dominant spp.          | 1122                      | 1.00             | 45.81 | 274                         | 0.94             | 21.23 | 273                   | 0.97             | 21.95 |
| % Lepomis                | 2389                      | 0.99             | 62.39 | 573                         | 0.97             | 30.12 | 573                   | 0.99             | 30.63 |
| % GSF+YB                 | 618                       | 0.95             | 28.68 | 145                         | 0.65             | 9.65  | 146                   | 0.80             | 11.56 |
| % invertivores           | 1130                      | 1.00             | 42.20 | 270                         | 0.96             | 19.97 | 271                   | 0.99             | 20.57 |
| % omnivores              | 1695                      | 1.00             | 50.80 | 433                         | 0.99             | 25.27 | 433                   | 1.00             | 25.60 |
| % insect. cyprinids      | 2067                      | 0.99             | 59.09 | 457                         | 0.93             | 26.12 | 458                   | 0.97             | 27.06 |
| % top carnivores         | 3007                      | 0.95             | 68.39 | 718                         | 0.68             | 24.48 | 719                   | 0.83             | 28.90 |
| % DELT+hybrids           | 3007                      | 0.85             | 54.61 | 718                         | 0.27             | 11.67 | 719                   | 0.52             | 17.69 |
| No. lithophilic spawners | 1885                      | 0.95             | 55.41 | 444                         | 0.63             | 18.56 | 444                   | 0.77             | 22.00 |
| % simple lithophils      | 1122                      | 1.00             | 42.67 | 274                         | 0.98             | 20.76 | 273                   | 1.00             | 21.09 |

220 Abbreviations:  $N$ , sample size; No., number; spp., species (singular or plural);  $z$ , test statistic used to determine statistical significance

221 of weighted Cohen’s  $\kappa$ . All other abbreviations follow the caption information for Table 1.

222

223 During metric-level analyses, the results of our Wilcoxon signed-rank test on paired SDR  
224 vs. ART regression  $R^2$ -values in R showed that these treatments produced significantly different  
225 goodness-of-fit statistic distributions across linear regressions of the 19 metrics ( $W = 2, z =$   
226  $-3.74, p < 0.001$ ). Additionally, paired Wilcoxon tests on SDR vs. ART slope ( $a$ ) results also  
227 showed significantly different slope distributions across linear regressions, between treatments  
228 ( $W = 0, z = -3.82, p < 0.001$ ). Comparisons involving the SRT treatment were not run, even for  
229 comparative purposes, due to violations of standard assumptions for statistical tests.

### 230 *Species composition and drainage area effects*

231 Consistent with Wan et al. (2010), evaluating impacts of upstream drainage area on  $S$ ,  $N$ , and  
232 nRMSE values revealed that  $S$  and  $N$  scaled weakly linearly with drainage area (especially in  
233 log–log space; JCB, unpublished results), increasing with each sequential  $S$  and  $N$  class (Fig  
234 S9A, B). However,  $S$  showed a slightly more pronounced positive correlation than  $N$ , the latter of  
235 which was more upwardly skewed for small numbers of samples. Median  $S$  increased over our  
236 drainage area classes, ranging from ~11 species for the smallest headwater streams ( $< 5 \text{ km}^2$ ) to  
237 22 species in the largest streams and rivers ( $> 115 \text{ km}^2$ ). Median  $N$  also increased with increasing  
238 sample abundance, from ~85 for the smallest drainage class ( $< 5 \text{ km}^2$ ), to ~215 for the second  
239 drainage area class ( $5\text{--}15 \text{ km}^2$ ) representing large headwater or headwater-adjacent streams, to  
240 ~330 for the largest drainage class. Consistent with our a priori hypothesis, and similar to the box  
241 plots examining stratification by species richness and abundance (Figs 4A, B), box plots of  
242 nRMSE values from the first removal treatment showed essentially no relationship between  
243 effects of SRT removal on IBI metric scores and our five drainage area classes (Fig. S9C).  
244 Impacts of removing singleton/doubleton taxa on IBI metrics were roughly similar across  
245 drainage sizes, but lower quantile and median nRMSE values were higher than for the SRT

246 removal and they also decreased slightly for the third drainage area class but increased in the  
 247 fourth drainage area class (Fig. S9D), and median values ranged from 14.4 to 20.4 for the SDR  
 248 removal treatment. By contrast, median values were noticeably higher for both the third and  
 249 fourth drainage area classes following the ART removal, and median and quantile values of

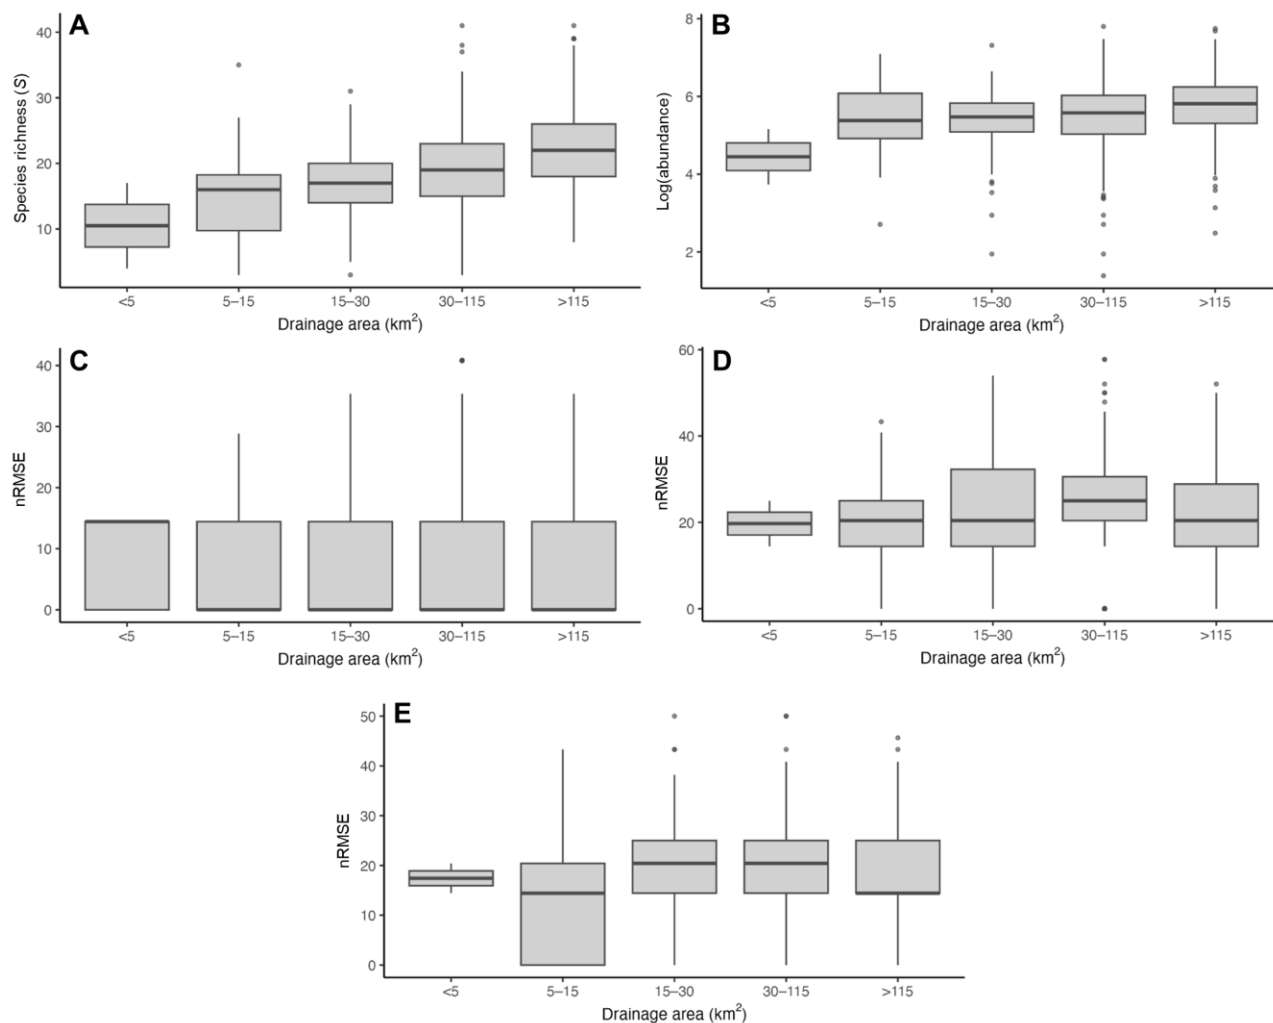

250  
 251 **Fig. S9** Box plots evaluating the effects of upstream drainage area on fish community  
 252 characteristics and IBI metric sensitivity to rare taxon removals in this study. Plotted along the y-  
 253 axis, the panels show (A) species richness ( $S$ ), (B) total abundance ( $N$ , number of individuals),  
 254 (C) IBI metric nRMSE values after removal of individual rare taxa within each site (SRT), (D)  
 255 IBI metric nRMSE values after removal of singleton/doubleton taxa (SDR), and (E) IBI metric  
 256 nRMSE values after removal of all rare taxa from within each site (ART treatment). Box  
 257 representations are the same as those described in the caption to Fig. S3 above, except each box  
 258 is filled with *gray shading* and separate boxes are plotted for each drainage area class.

259 nRMSE from the ART treatment ranged from 20.4 to 22.7 and essentially showed no overall  
260 relationship with increasing drainage size (Fig. S9E).

### 261 *Ichthyoregion-specific effects of rare taxon removal*

262 Ichthyoregion-specific results are discussed in the main text while referencing the supplementary  
263 Fig. S10 *below*, which shows effects of our treatments on site IBI metrics and IBI scores, as  
264 judged by  $\Delta$ IBIs and nRMSEs, respectively, plotted as a function of ichthyoregion. The  $\Delta$ IBIs  
265 and nRMSEs had median values at/near zero under the SRT treatment (Fig. S10A,B), indicating  
266 limited effects of single rare taxon removals, as well as similar effects of this treatment across  
267 space and biogeographic context, as represented by Alabama's ichthyoregions. By contrast, the  
268 greatest effects were witnessed in the SP and HCT ichthyoregions, which are located below the  
269 Fall Line (O'Neil and Shepard 2007, 2009, 2010), under the SDR and ART treatments. Stronger  
270 effects in these regions were primarily registered as effects on metric scores, i.e., higher median  
271 nRMSE values, for these treatments, and the significance of differences in nRMSE between  
272 ichthyoregions within treatments was evaluated using Kruskal–Wallis omnibus tests discussed in  
273 the text. Kruskal–Wallis tests pool all response variable values across groups, sort them from  
274 smallest to largest, and substitute them with ranks; ranks belonging to each group are averaged to  
275 yield a mean rank; and the null hypothesis, that the difference between the mean ranks of all  
276 groups is zero, is tested. Since we obtained significant results in analyses of each treatment, post-  
277 hoc Dunn tests with Holm correction were used to see which pairwise relationships between  
278 groups (i.e., ichthyoregions) showed significant differences, and thus contributed to the  
279 significant test results. Post-hoc Dunn tests (Table S3) indicated that the SP ichthyoregion  
280 exhibited significantly higher nRMSE than the P ichthyoregion (ART:  $p_{\text{Holm-adjusted}} < 0.001$ ; SDR:  
281  $p_{\text{Holm-adjusted}} < 0.0001$ ), RVP ichthyoregion (ART:  $p_{\text{Holm-adjusted}} = 0.0014$ ; SDR:  $p_{\text{Holm-adjusted}} = <$

282 0.0001), and TV ichthyoregion (SRT:  $p_{\text{Holm-adjusted}} = 0.0073$ ; SDR:  $p_{\text{Holm-adjusted}} < 0.0001$ ; ART:  
 283  $p_{\text{Holm-adjusted}} = 0.0022$ ) under two or more treatments. The HCT ichthyoregion showed  
 284 significantly higher nRMSE than the P ichthyoregion (ART:  $p_{\text{Holm-adjusted}} = 0.0056$ ; SDR:  $p_{\text{Holm-}}$   
 285  $p_{\text{Holm-adjusted}} = 0.0146$ ), RVP ichthyoregion (ART:  $p_{\text{Holm-adjusted}} = 0.0115$ ; SDR:  $p_{\text{Holm-adjusted}} = 0.0260$ ),  
 286 and TV ichthyoregion (ART:  $p_{\text{Holm-adjusted}} = 0.0125$ ) under the ART and SDR treatments. By

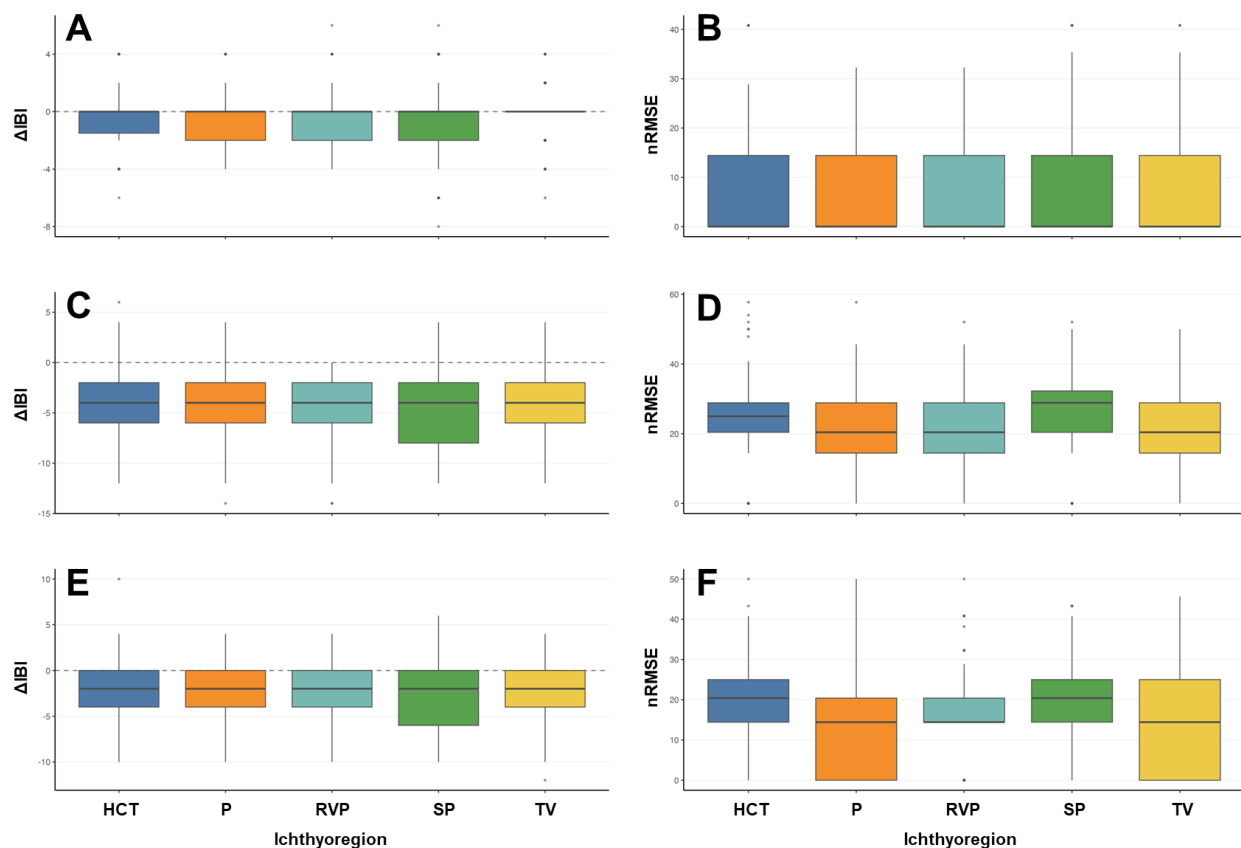

287  
 288 **Fig. S10** Summaries of changes in IBI score ( $\Delta\text{IBI}$ ) across sites (left column) and IBI metric  
 289 nRMSE (right column) as a function of ichthyoregion ( $n = 5$ ; Fig. S1). Results are presented as  
 290 box plots stratified ichthyoregion for our three treatments, including (A, B) SRT removal, (C, D)  
 291 SDR removal, and (E, F) ART removal. Box representations are the same as those described in  
 292 the caption to Fig. S3 *above*, except each box is assigned a different *color* based on  
 293 ichthyoregion (*x*-axis labels; abbreviations: HCT, Hills and Coastal Terraces; P, Plateau; RVP,  
 294 Ridge and Valley/Piedmont; SP, Southern Plains; TV, Tennessee Valley).

295

296 **Table S3** Summary of Dunn post-hoc test results evaluating the magnitude and significance of differences in nRMSEs for all pairs of  
 297 ichthyoregions, within each treatment. For each treatment, the groups compared are listed along with the resulting *Z* statistic, raw *p*-  
 298 value of the test, Holm-adjusted *p*-value, and significance level (see inset caption details in text box).

| Treatment | Group 1 | Group 2 | <i>Z</i> | <i>p</i> (raw)    | <i>p</i> (Holm-adjusted) | Significance |
|-----------|---------|---------|----------|-------------------|--------------------------|--------------|
| SRT       | HCT     | P       | -0.871   | 0.384             | 1.000                    |              |
| SRT       | HCT     | RVP     | 2.037    | 0.042             | 0.250                    |              |
| SRT       | P       | RVP     | 2.937    | 0.003             | 0.027                    | *            |
| SRT       | HCT     | SP      | -1.599   | 0.110             | 0.439                    |              |
| SRT       | P       | SP      | -0.706   | 0.480             | 0.961                    |              |
| SRT       | RVP     | SP      | -3.751   | <i>p</i> < 0.001  | 0.002                    | **           |
| SRT       | HCT     | TV      | 1.770    | 0.077             | 0.383                    |              |
| SRT       | P       | TV      | 2.607    | 0.009             | 0.064                    |              |
| SRT       | RVP     | TV      | -0.122   | 0.903             | 0.903                    |              |
| SRT       | SP      | TV      | 3.349    | <i>p</i> < 0.001  | 0.007                    | **           |
| SDR       | HCT     | P       | 3.077    | 0.002             | 0.015                    | *            |
| SDR       | HCT     | RVP     | 2.853    | 0.004             | 0.026                    | *            |
| SDR       | P       | RVP     | -0.409   | 0.683             | 1.000                    |              |
| SDR       | HCT     | SP      | -1.662   | 0.097             | 0.386                    |              |
| SDR       | P       | SP      | -4.764   | <i>p</i> < 0.0001 | <i>p</i> < 0.0001        | ***          |
| SDR       | RVP     | SP      | -4.644   | <i>p</i> < 0.0001 | <i>p</i> < 0.0001        | ***          |
| SDR       | HCT     | TV      | 2.340    | 0.019             | 0.096                    |              |
| SDR       | P       | TV      | -0.678   | 0.498             | 1.000                    |              |
| SDR       | RVP     | TV      | -0.317   | 0.751             | 0.751                    |              |
| SDR       | SP      | TV      | 3.987    | <i>p</i> < 0.0001 | <i>p</i> < 0.0001        | ***          |
| ART       | HCT     | P       | 3.352    | <i>p</i> < 0.001  | 0.006                    | **           |
| ART       | HCT     | RVP     | 3.102    | 0.002             | 0.012                    | *            |
| ART       | P       | RVP     | -0.450   | 0.652             | 1.000                    |              |
| ART       | HCT     | SP      | -0.601   | 0.548             | 1.000                    |              |
| ART       | P       | SP      | -3.989   | <i>p</i> < 0.0001 | <i>p</i> < 0.001         | ***          |
| ART       | RVP     | SP      | -3.778   | <i>p</i> < 0.001  | 0.001                    | **           |
| ART       | HCT     | TV      | 3.022    | 0.003             | 0.013                    | *            |
| ART       | P       | TV      | -0.269   | 0.788             | 1.000                    |              |
| ART       | RVP     | TV      | 0.158    | 0.875             | 0.875                    |              |
| ART       | SP      | TV      | 3.643    | <i>p</i> < 0.001  | 0.002                    | **           |

In Table S3, ichthyoregion abbreviation definitions follow the main text and Fig. S1. Significance: \* *p* < 0.05; \*\* *p* < 0.01; \*\*\* *p* < 0.001 (all Holm-adjusted). Also, positive *Z*-values indicate that Group 1 had a higher nRMSE rank than Group 2.

300 contrast, no pairwise contrast involving the two least sensitive ichthyoregions, i.e., the TV and P  
301 ichthyoregions located above the Fall Line, was statistically significant at the  $\alpha = 0.05$  level  
302 under any treatment. Taken together, the Kruskal–Wallis and Dunn post-hoc test results indicate  
303 that the elevated nRMSE values observed in HCT and SP (Fig. S10) reflect a statistically robust,  
304 ichthyoregion-level pattern rather than a sampling artifact, and that this pattern persists across  
305 multiple treatments and multiple pairwise comparisons after correction for multiple testing  
306 (Table S3).

### 307 **Supplementary Discussion**

308 Multimetric indices such as the IBI integrate information from biological surveys and drainage  
309 characteristics to reveal the structure of local aquatic ecosystems and their responses to human-  
310 induced stressors and environmental degradation (Karr 1981; Karr et al. 1986). One key aspect  
311 of MMI and IBI applications is component metric selection. Effective metrics must be sensitive,  
312 repeatable, capable of distinguishing natural variability in biological condition from human  
313 influences, and limited in sensitivity to sampling error (Herricks and Shaefer 1985; Karr et al.  
314 1986; Karr and Chu 1997; Vadas et al. 2022). To date, however, studies of IBI sensitivity to  
315 errors and variation in component metrics have been sporadic, leaving the topic understudied.  
316 Available studies have also used different methods to analyze widely varying datasets, making  
317 comparisons difficult. For example, evaluations of the sensitivity of IBI metrics and outcomes to  
318 subsampling ( $n = 9$  lakes; Barbour and Gerritsen 1996), repeat sampling ( $n = 12$ – $37$  sites; Fore et  
319 al. 1994; Hughes et al. 1998), IBI metrics ( $n = 46$ – $84$  sites; Angermeier and Karr 1986), rare taxa  
320 ( $n = 378$  sites; Wan et al. 2010), and DELTs/anomalies and hybrids ( $n = 646$  sites; Bagley et al.  
321 2025) have used macroinvertebrate or fish datasets varying over  $\sim 70$ -fold in sample size. We  
322 recently showed that fish IBIs for Alabama streams were robust to errors in detecting

323 DELTs/anomalies and hybridization, but artificial errors altered 13.2% of IBI scores and ~6% of  
324 condition ratings, with important management implications (Bagley et al. 2025). While Bagley et  
325 al. (2025) focused on the effects of a single metric—the ‘% DELT + hybrids’ metric, they also  
326 highlighted the need for broader sensitivity analyses evaluating multiple IBI metrics and  
327 outcomes and further exploring the space of IBI responses to sampling errors. In the present  
328 study, we took steps towards meeting this need, and our results demonstrate that Alabama fish  
329 IBI metrics and outcomes are consistently and significantly disrupted by simulated non-detection  
330 of rare taxa, extending the core findings of Wan et al. (2010) to a state with among the most  
331 diverse aquatic faunas in the contiguous United States and validating the generality of their  
332 findings for Midwestern US fishes across sharply contrasting ecological and biogeographical  
333 regions in the southeastern US.

334         The fact that we found a congruent pattern between our results for Alabama fish IBIs and  
335 those that Wan et al. (2010) reported for Minnesota, with species richness-based metrics being  
336 more sensitive to rare taxon removal than abundance-based metrics, is particularly noteworthy  
337 given that metrics showed only ~44% similarity between our two studies. For example, our  
338 dataset containing eight similar IBI metrics (‘Total native species’, ‘Number of darter + madtom  
339 species’, ‘Number of intolerant species’, ‘% dominant species’, ‘% DELT + hybrids’, ‘%  
340 omnivores’, ‘% simple lithophils’, and ‘% of tolerant species’; Table 1) as compared with those  
341 of Wan et al. (2010), plus 11 metrics that differed from the metrics that they used. Such higher-  
342 level congruence despite lower-level methodological differences suggests that this trend has  
343 generality across space and time and is likely to translate well to other warmwater stream IBI  
344 tools and systems in other areas of North America, if not other regions.

345         Our inferences that singletons/doubletons are commonly encountered during Alabama

346 fish IBI surveys and that singleton/doubleton removal had the greatest effects on IBI metrics and  
347 outcomes add important insights to our understanding of fish community ecology and surface  
348 water bioassessment in the state. Singleton/doubleton observations are often viewed as indicative  
349 of scarce local populations (e.g., Maciel and Arlé 2020), but systematists have shown that  
350 singletons are very common in nature and in taxonomic treatments (e.g., Lim et al. 2011). Even  
351 so, we do not assume that taxa appearing in our dataset as singleton or doubleton observations  
352 are intrinsically rare in nature—only that they were *sampled* in very low numbers during the time  
353 and at the location of the corresponding field survey, since 1) detection probabilities vary widely  
354 among species and 2) fish species were not exhaustively sampled to determine their true  
355 abundances (instead, all observations reflect relative abundances; *cf.* Bayley and Peterson 2001;  
356 Kanno et al. 2009). Reasons that singleton/doubleton observations during fish IBI surveys might  
357 not reflect fish species true abundances within streams include failures to observe individuals  
358 due to depth or turbidity, as well as interspecific variation in susceptibility to electrofishing (e.g.,  
359 ictalurids vs. other taxa; Kanno et al. 2009).

360

## 361 **References\***

- 362 Bayley PB, Peterson JT (2001) An approach to estimate probability of presence and richness of  
363 fish species. *Trans Am Fish Soc* 130:620–633. [https://doi.org/10.1577/1548-  
364 8659\(2001\)130%3C0620:AATEPO%3E2.0.CO;2](https://doi.org/10.1577/1548-8659(2001)130%3C0620:AATEPO%3E2.0.CO;2)
- 365 Fore LS, Karr JR, Conquest LL (1994) Statistical properties of an index of biological integrity  
366 used to evaluate water resources. *Can J Fish Aquat Sci* 51:1077–1087.  
367 <https://doi.org/10.1139/f94-107>
- 368 Herricks EE, Schaeffer DJ (1985) Can we optimize biomonitoring? *Environ Manage* 9:487–492.  
369 <https://doi.org/10.1007/BF01867323>
- 370 Hughes RM, Kaufmann, P. R., Herlihy, A. T., Kincaid, T. M., Reynolds, L., Larsen DP (1998) A  
371 process for developing and evaluating indices of fish assemblage integrity. *Can J Fish*

372 Aquat Sci 55:1618–1631. <https://doi.org/10.1139/cjfas-55-7-1618>

373 Lim GS, Balke M., Meier R (2012) Determining species boundaries in a world full of rarity:  
374 singletons, species delimitation methods. Syst Biol 61(1):165–169.  
375 <https://doi.org/10.1093/sysbio/syr030>

376 Maciel EA, Arlé E (2020) Rare7: An R package to assess the forms of rarity in a  
377 community. Ecol Indic 115:106419. <https://doi.org/10.1016/j.ecolind.2020.106419>

378 Stout C, Schonhuth S, Mayden R, Garrison NL, Armbruster JW (2022) Phylogenomics and  
379 classification of Notropis and related shiners (Cypriniformes: Leuciscidae) and the utility  
380 of exon capture on lower taxonomic groups. PeerJ 10: e14072.

381 Tan M, Armbruster JW (2018) Phylogenetic classification of extant genera of fishes of the order  
382 Cypriniformes (Teleostei: Ostariophysii). Zootaxa 4476(1):6–39.  
383 <https://doi.org/10.11646/zootaxa.4476.1.4>

384

385 \* Only includes references not cited in the main text; see text for additional details.
